# Supplementary material
Source: Springer Nature journal article supplement (https://www.springermedizin.de/resource/supplementary/12879_2005_315_MOESM1_ESM.pdf/9448758)
Supplement: MOESM1 [file 9448758]

**Additional file 1: Antibiotic susceptibility testing of vaginal bacteria for 15 antibiotics.**

| Species                        | Reference number        | AM <sup>a</sup> | AZ      | BA   | XM      | CI    | CM          | CO     | DC       | KM    | LZ         | MZ               | NA    | PG    | RI      | VA    |
|--------------------------------|-------------------------|-----------------|---------|------|---------|-------|-------------|--------|----------|-------|------------|------------------|-------|-------|---------|-------|
| <i>Atopobium vaginae</i>       | CCUG 42099              | 0.094           | < 0.016 | 3    | 0.25    | 0.064 | < 0.016     | > 1024 | 0.75     | 12    | 0.094      | 2/2 <sup>b</sup> | > 256 | 0.25  | < 0.002 | 2.0   |
| <i>Atopobium vaginae</i>       | CCUG 44116              | 0.032           | < 0.016 | 3    | 0.125   | 0.25  | < 0.016     | > 1024 | 0.19     | 12    | 0.032      | 4/4              | > 256 | 0.064 | < 0.002 | 1.5   |
| <i>Atopobium vaginae</i>       | CCUG 44258              | 0.023           | < 0.016 | 4    | 0.19    | 0.064 | < 0.016     | > 1024 | 0.38     | 16    | 0.023      | > 256/> 256      | > 256 | 0.094 | < 0.002 | 1.5   |
| <i>Atopobium vaginae</i>       | PB2003/009-T1-4         | < 0.016         | < 0.016 | 1    | 0.016   | 0.023 | < 0.016     | > 1024 | 0.38     | 16    | 0.125      | 12/12            | > 256 | 0.008 | < 0.002 | 1.0   |
| <i>Atopobium vaginae</i>       | PB2003/017-T1-2         | < 0.016         | < 0.016 | 1.5  | 0.125   | 0.032 | < 0.016     | > 1024 | 0.25     | 16    | 0.125      | > 256            | > 256 | 0.008 | < 0.002 | 1.5   |
| <i>Atopobium vaginae</i>       | CCUG 38953 <sup>T</sup> | 0.094           | < 0.016 | 3    | 0.023   | 0.032 | < 0.016     | > 1024 | 0.25     | 8     | 0.125      | > 256/> 256      | > 256 | 0.125 | < 0.002 | 1.5   |
| <i>Atopobium vaginae</i>       | CCUG 44125              | 0.047           | < 0.016 | 3    | 0.25    | 0.064 | < 0.016     | > 1024 | 0.19     | 12    | 0.047      | 8/8              | > 256 | 0.19  | < 0.002 | 1.0   |
| <i>Atopobium vaginae</i>       | CCUG 44061              | 0.023           | < 0.016 | 3    | 0.19    | 0.047 | < 0.016     | > 1024 | 0.38     | 12    | 0.023      | 16/16            | > 256 | 0.19  | < 0.002 | 1.5   |
| <i>Atopobium vaginae</i>       | PB2003/189-T1-4         | 0.016           | 0.32    | 3    | 0.125   | 0.19  | < 0.016     | > 1024 | 0.38     | 16    | 0.016      | 6 / 8            | > 256 | 0.008 | < 0.002 | 1.0   |
|                                |                         |                 |         |      |         |       |             |        |          |       |            |                  |       |       |         |       |
| <i>Bifidobacterium breve</i>   | FB034-05AE              | 0.38            | 0.25    | 3    | 8       | 4     | < 0.016     | > 1024 | 24/32    | > 256 | 0.38       | > 256            | > 256 | 0.5   | 0.19    | 1     |
| <i>Bifidobacterium longum</i>  | FB050-05AN              | 0.25            | 0.064   | 1    | 1.5     | 6     | < 0.016     | 256    | 0.5      | 32    | 0.25       | 4                | > 256 | 0.19  | 0.25    | 0.38  |
|                                |                         |                 |         |      |         |       |             |        |          |       |            |                  |       |       |         |       |
| <i>Gardnerella vaginalis</i>   | BVS 26                  | < 0.016         | 0.023   | 1    | 0.125   | 1     | < 0.016     | > 1024 | 0.5/0.25 | 32    | 0.25       | 0.75             | > 256 | 0.016 | 0.5     | 0.38  |
| <i>Gardnerella vaginalis</i>   | FB022-1                 | < 0.016         | < 0.016 | 0.75 | < 0.016 | 1.5   | < 0.016     | > 1024 | 32/24    | 24    | 0.125      | 16               | > 256 | 0.004 | 0.5     | 0.125 |
| <i>Gardnerella vaginalis</i>   | FB061-3                 | < 0.016         | < 0.016 | 2    | 0.032   | 2     | < 0.016     | > 1024 | 0.75/0.5 | 16    | 0.25/0.125 | 1                | > 256 | 0.008 | 0.75    | 0.5   |
| <i>Gardnerella vaginalis</i>   | FB049-2                 | 0.047           | 0.047   | 2    | 0.094   | 0.75  | 0.032/0.047 | > 1024 | 0.25     | 32    | 0.19       | 1                | > 256 | 0.047 | 0.75    | 0.38  |
|                                |                         |                 |         |      |         |       |             |        |          |       |            |                  |       |       |         |       |
| <i>Lactobacillus crispatus</i> | PB2003/023-T3-2         | 0.125           | 0.064   | 8    | 1       | > 32  | < 0.016     | 96     | 4        | 32    | 1.5        | > 256            | > 256 | 0.094 | 2       | 0.38  |
| <i>Lactobacillus jensenii</i>  | PB2003/035-T2-1         | 0.25            | 0.125   | 0.75 | 1       | > 32  | 0.125       | 86     | 12       | 24    | 0.38       | > 256            | > 256 | 0.047 | 0.64    | 1     |
| <i>Lactobacillus gasseri</i>   | PB2003/051-T3-2. LAB114 | 0.125           | 0.094   | 48   | 1       | > 32  | 4           | > 1024 | 2        | > 256 | 1.5        | > 256            | > 256 | 0.047 | 0.016   | 1     |
| <i>Lactobacillus iners</i>     | PB2003/195-T1-1         | 0.064           | 0.094   | 1.5  | < 0.016 | 0.25  | 0.19        | 96     | 2        | 6     | 0.125      | > 256            | 64    | 0.047 | 0.94    | 0.75  |
| <i>Lactobacillus iners</i>     | FB088-1                 | 0.5/0.38        | 0.023   | 1    | 0.032   | 0.38  | 0.125       | 192    | 0.064    | 8     | 0.19       | > 256            | > 256 | 0.19  | 0.094   | 0.75  |

Legend:

**AM:** ampicillin; **AZ:** azithromycin; **BA:** bacitracin; **XM:** cefuroxime; **CI:** ciprofloxacin; **CM:** clindamycin; **CO:** colistin; **DC:** doxycycline; **KM:** kanamycin; **LZ:** linezolid; **MZ:** metronidazole; **NA:** nalidixic acid; **PG:** penicillin; **RI:** rifampicin; **VA:** vancomycin.

a. Data in µg/ml.

b. Values before and after slash indicate results from duplicate testing.
